# Supplementary material
Source: PubMed Central journal article supplement (PMC8591146)
Supplement: NIHMS1705330-supplement-1.pdf [file NIHMS1705330-supplement-1.pdf]

Comprehensive analysis of *ADA2* genetic variants and estimation of carrier frequency  
driven by a function-based approach

Hyuk Jee BS, Zhengping Huang MD, Samantha Baxter MS CGC, Yuelong Huang PhD,  
Maria Taylor BS, Lauren A. Henderson MD MMsc, Sofia Rosenzweig BS,  
Aman Sharma MD FRCP, Eugene P. Chambers MD, Michael S. Hershfield MD,  
Qing Zhou PhD, Fatma Dedeoglu MD, Ivona Aksentijevich MD, Peter A. Nigrovic MD,  
Anne O'Donnell-Luria MD PhD, Pui Y. Lee, MD PhD

Online repository materials

Table E1. DADA2-associated variants grouped by variant type.

Table E2. Description of in silico prediction algorithms.

Table E3. Functional analysis of ADA2 variants.

Table E4. Aggregate minor allelic frequency and most common deleterious *ADA2*  
variants at different cut-offs of ADA2 activity.

Figure E1. Evaluation of missense variants found in DADA2 patients by silico prediction  
algorithms.

Figure E2. Evaluation of 100 ADA2 variants in gnomAD by in silico prediction  
algorithms.

References for Online Repository

**Table E1.** DADA2-associated variants grouped by variant type. <sup>1-37</sup>

**Missense variants**

|      |       |       |       |       |       |       |
|------|-------|-------|-------|-------|-------|-------|
| M1T  | A109D | L188V | L311R | F355L | V414M | V458D |
| R9W  | P106S | P193L | G321A | A357T | N423K | Y482C |
| G25C | H112Q | F207S | G321E | G358R | M445K | W501R |
| R34W | H112Y | M232T | G326V | T360A | F446S |       |
| R45W | N127I | D238N | E328D | N370I | G450C |       |
| G47A | T129P | M243R | E328K | N370K | L451F |       |
| G47R | Y130C | L249P | H335P | G383D | L451W |       |
| G47V | R169Q | P251L | P344L | G383S | Y453C |       |
| G47W | F178S | W264S | L351Q | C408Y | D454H |       |
| I93T | L188P | S291L | Y353H | P409S | Y456C |       |

**Single AA deletions**

K55Del  
F212Del  
Y236Del

**Frameshift variants**

R49Gfs4\*    T317Rfs\*25  
R49A fs\*13    M465fsX  
R131Sfs\*52    K466Tfs\*2  
I143Sfs\*41    S483Pfs\*5  
I210Tfs\*57    K449N fs \*2  
Y227C fs\*27    V325Tfs\*7  
D261P fs\*2

**Nonsense variants**

Y220X  
S265X  
R306X  
312X  
W399X  
M465X  
W501X

**Table E2.** Description of in silico prediction algorithms.

| Algorithm (Ref)                 | Description                                                                                                                                                                                                                                                                                                                                                                                                                                                                                                                                                                                                                                      |
|---------------------------------|--------------------------------------------------------------------------------------------------------------------------------------------------------------------------------------------------------------------------------------------------------------------------------------------------------------------------------------------------------------------------------------------------------------------------------------------------------------------------------------------------------------------------------------------------------------------------------------------------------------------------------------------------|
| mCSM <sup>38</sup>              | mCSM (mutation Cutoff Scanning Matrix) utilizes a graph-based approach in characterizing geometric patterns of the wild-type protein and predicting a given variant's impact on the protein's structural and functional stability.                                                                                                                                                                                                                                                                                                                                                                                                               |
| SDM <sup>39</sup>               | SDM (Site Directed Mutator) calculates the difference in free energy between wild-type and mutant proteins based on environment-specific amino-acid substitution frequencies within homologous protein families.                                                                                                                                                                                                                                                                                                                                                                                                                                 |
| DUET <sup>40</sup>              | DUET integrates mCSM and SDM to provide consensus predictions.                                                                                                                                                                                                                                                                                                                                                                                                                                                                                                                                                                                   |
| PoPMuSiC-2.1 <sup>41</sup>      | PoPMuSiC-2.1 predicts the thermodynamic stability and solvent accessibility changes caused by amino acid substitutions.                                                                                                                                                                                                                                                                                                                                                                                                                                                                                                                          |
| SIFT <sup>42</sup>              | SIFT (Sorting Intolerant from Tolerant) analyzes the evolutionary relationships of a target sequence to determine whether a given variant will likely impact protein functionality.                                                                                                                                                                                                                                                                                                                                                                                                                                                              |
| Polyphen2 <sup>43</sup>         | Polyphen2 utilizes multiple sequence-based and structure-based features to predict the impact of amino acid substitutions. The HumDiv dataset was derived from all damaging alleles with known effects on the molecular function causing human Mendelian diseases, present in the UniProtKB database, together with differences between human proteins and their closely related mammalian homologs, assumed to be non-damaging. The HumVar dataset was comprised of all human disease-causing variants from UniProtKB, together with common human nsSNPs (MAF>1%) without annotated involvement in disease, which were treated as non-damaging. |
| REVEL <sup>44</sup>             | REVEL (rare exome variant ensemble learner) is an ensemble method for evaluation of missense variants using data from 13 other algorithms.                                                                                                                                                                                                                                                                                                                                                                                                                                                                                                       |
| MutationTaster <sup>45</sup>    | Mutation Taster utilizes integrated data from GeneDistiller, Ensembl, SwissProt, UniProt2, and HapMap4 and determines variant deleteriousness using a naïve Bayes classifier.                                                                                                                                                                                                                                                                                                                                                                                                                                                                    |
| Mutation Assessor <sup>46</sup> | Mutation Assessor predicts the functional impact of amino-acid substitutions by comparing protein family sequence alignments and effects of residue placement in known or homology-based 3D protein structures.                                                                                                                                                                                                                                                                                                                                                                                                                                  |
| PROVEAN <sup>47</sup>           | PROVEAN (Protein Variation Effect Analyzer) evaluates protein sequence homology, substitution frequency and the biochemical impact of amino acid substitution as well as insertions / deletions.                                                                                                                                                                                                                                                                                                                                                                                                                                                 |
| VEST 3.0 <sup>48</sup>          | VEST (Variant Effect Scoring Tool) uses a supervised machine learning algorithm to identify likely functional missense variants based on training dataset of missense variants from the Human Gene Mutation Database and Exome Sequencing Project.                                                                                                                                                                                                                                                                                                                                                                                               |
| MetaSVM <sup>49</sup>           | MetaSVM is an ensemble predictor that utilizes support vector machine (SVM) methodology to integrate data from 18 other prediction algorithms.                                                                                                                                                                                                                                                                                                                                                                                                                                                                                                   |
| MetaLR <sup>49</sup>            | MetaLR is an ensemble predictor that utilizes logistic regression (LR) methodology to integrate data from 18 other prediction algorithms.                                                                                                                                                                                                                                                                                                                                                                                                                                                                                                        |
| M-CAP <sup>50</sup>             | M-CAP (Mendelian Clinically Applicable Pathogenicity) is an ensemble predictor that incorporates 9 established pathogenicity likelihood scores; 7 seven established measures of base-pair, amino acid, genomic region, and gene conservation; and additional new features to facilitate machine learning.                                                                                                                                                                                                                                                                                                                                        |

| Algorithm (Ref)          | Description                                                                                                                                                                                                                                                                      |
|--------------------------|----------------------------------------------------------------------------------------------------------------------------------------------------------------------------------------------------------------------------------------------------------------------------------|
| CADD <sup>51</sup>       | Combined Annotation Dependent Depletion (CADD) is an ensemble method that integrates diverse genome annotations to evaluate any possible human single nucleotide variant or small insertion/deletion event by machine learning.                                                  |
| DANN <sup>52</sup>       | DANN is an ensemble method that uses the same feature set and training data as CADD to train a deep neural network (DNN).                                                                                                                                                        |
| FATHMM-MKL <sup>53</sup> | FATHMM-MKL integrates functional annotations from ENCODE with nucleotide-based sequence conservation measures based on multiple kernel learning (MKL).                                                                                                                           |
| Eigen <sup>54</sup>      | Eigen is an unsupervised approach that integrates functional annotations of human genetic variations into one measure of functional importance without reliance on labeled training data.                                                                                        |
| GERP++ <sup>55</sup>     | GERP(Genomic Evolutionary Rate Profiling)++ is a prediction tool based on evolutionary conservation that uses maximum likelihood evolutionary rate estimation for position-specific scoring and a novel dynamic programming approach to subsequently define constrained elements |

**Table E3.** Functional analysis of ADA2 variants.\*

| Rank | Protein     | Transcript | Chr 22 Position | RefSNP ID    | Allele Frequency <sup>+</sup> | ADA2 activity* |
|------|-------------|------------|-----------------|--------------|-------------------------------|----------------|
| 1    | p.His335Arg | c.1004A>G  | 17669306        | rs2231495    | 3.44E-01                      | 99.6           |
| 2    | p.Val349Ile | c.1045G>A  | 17669265        | rs74317375   | 2.14E-03                      | 100.6          |
| 3    | p.Met309Ile | c.927G>A   | 17670877        | rs146597836  | 1.67E-03                      | 34.3           |
| 4    | p.Arg171Trp | c.511C>T   | 17687992        | rs115986203  | 1.57E-03                      | 78.9           |
| 5    | p.Thr65Met  | c.194C>T   | 17690374        | rs61747288   | 6.29E-04                      | 87.8           |
| 6    | p.Pro435Ala | c.1303C>G  | 17662849        | rs186147069  | 5.66E-04                      | 32.0           |
| 7    | p.Arg230Gln | c.689G>A   | 17684517        | rs186116639  | 4.95E-04                      | 89.3           |
| 8    | p.Arg169Gln | c.506G>A   | 17687997        | rs77563738   | 4.74E-04                      | 0.5            |
| 9    | p.Glu489Asp | c.1467G>C  | 17662442        | rs61738625   | 4.00E-04                      | 59.1           |
| 10   | p.Phe355Leu | c.1065C>A  | 17669245        | rs116020027  | 2.34E-04                      | 58.6           |
| 11   | p.Ile462Thr | c.1385T>C  | 17662767        | rs61744537   | 1.45E-04                      | 39.9           |
| 12   | p.Met121Thr | c.362T>C   | 17688141        | rs189403607  | 1.41E-04                      | 57.6           |
| 13   | p.Met84Val  | c.250A>G   | 17690318        | rs143853882  | 1.41E-04                      | 94.2           |
| 14   | p.Glu489Gln | c.1465G>C  | 17662444        | rs45497794   | 1.34E-04                      | 92.9           |
| 15   | p.Arg49Trp  | c.145C>T   | 17690423        | rs199614299  | 1.10E-04                      | 36.1           |
| 16   | p.Gly47Arg  | c.139G>A   | 17690429        | rs202134424  | 1.06E-04                      | 7.9            |
| 17   | p.Val458Gly | c.1373T>G  | 17662779        | rs748893301  | 1.03E-04                      | 100.0          |
| 18   | p.Tyr453Cys | c.1358A>G  | 17662794        | rs376785840  | 8.84E-05                      | 3.3            |
| 19   | p.Phe211Tyr | c.632T>A   | 17684574        | rs373928007  | 8.84E-05                      | 18.2           |
| 20   | p.Arg9Gln   | c.26G>A    | 17690542        | rs766367978  | 8.44E-05                      | 30.2           |
| 21   | p.Met121Ile | c.363G>A   | 17688140        | rs756689332  | 8.36E-05                      | 42.1           |
| 22   | p.Arg154Cys | c.460C>T   | 17688043        | rs200153182  | 8.35E-05                      | 24.1           |
| 23   | p.Arg45Gln  | c.134G>A   | 17690434        | rs571235882  | 8.13E-05                      | 75.9           |
| 24   | p.Asp4Asn   | c.10G>A    | 17690558        | rs370257828  | 7.91E-05                      | 100.5          |
| 25   | p.Arg34Trp  | c.100C>T   | 17690468        | rs750955849  | 7.78E-05                      | 6.1            |
| 26   | p.Met445Ile | c.1335G>A  | 17662817        | rs1265300292 | 6.37E-05                      | 75.4           |
| 27   | p.Ser7Cys   | c.20C>G    | 17690548        | rs1157179878 | 6.37E-05                      | 95.8           |
| 28   | p.Thr213Ile | c.638C>T   | 17684568        | rs1446203580 | 6.37E-05                      | 98.4           |
| 29   | p.Gly47Ala  | c.140G>C   | 17690428        | rs200930463  | 6.01E-05                      | 20.9           |
| 30   | p.Leu188Val | c.562C>G   | 17684644        | rs765219776  | 5.98E-05                      | 45.7           |
| 31   | p.Thr317Met | c.950C>T   | 17670854        | rs146788085  | 5.66E-05                      | 90.4           |
| 32   | p.Ala247Val | c.740C>T   | 17684466        | rs750868279  | 5.31E-05                      | 55.9           |
| 33   | p.His91Arg  | c.272A>G   | 17690296        | rs149466386  | 5.30E-05                      | 90.5           |
| 34   | p.Leu311Arg | c.932T>G   | 17670872        | rs780693700  | 5.17E-05                      | 2.1            |
| 35   | p.Val508Met | c.1522G>A  | 17662387        | rs767440845  | 5.17E-05                      | 94.0           |
| 36   | p.Ala35Val  | c.104C>T   | 17690464        | rs151283756  | 4.95E-05                      | 57.7           |
| 37   | p.Ala345Thr | c.1033G>A  | 17669277        | rs752798667  | 4.95E-05                      | 94.3           |
| 38   | p.Gly48Glu  | c.143G>A   | 17690425        | rs140149634  | 4.60E-05                      | 38.8           |
| 39   | p.Gly47Val  | c.140G>T   | 17690428        | rs200930463  | 4.60E-05                      | 1.4            |
| 40   | p.Asp329Asn | c.985G>A   | 17669325        | rs369716341  | 4.25E-05                      | 67.3           |
| 41   | p.Gln145His | c.435G>C   | 17688068        | rs752626692  | 4.24E-05                      | 61.2           |

| Rank | Protein     | Transcript | Chr 22 Position | RefSNP ID    | Allele Frequency* | ADA2 activity* |
|------|-------------|------------|-----------------|--------------|-------------------|----------------|
| 42   | p.Ser205Leu | c.614C>T   | 17684592        | rs369306297  | 3.58E-05          | 18.2           |
| 43   | p.Gly383Ser | c.1147G>A  | 17663586        | rs770689762  | 3.58E-05          | 1.9            |
| 44   | p.Val418Leu | c.1252G>T  | 17662900        | rs142726959  | 3.55E-05          | 30.4           |
| 45   | p.Pro251Leu | c.752C>T   | 17684454        | rs148936893  | 3.54E-05          | 4.0            |
| 46   | p.Arg45Trp  | c.133C>T   | 17690435        | rs777683953  | 3.54E-05          | 55.5           |
| 47   | p.Arg312Gln | c.935G>A   | 17670869        | rs746970158  | 3.54E-05          | 65.3           |
| 48   | p.Gly25Ser  | c.73G>A    | 17690495        | rs373732727  | 3.19E-05          | 71.1           |
| 49   | p.Ile367Leu | c.1099A>C  | 17663634        | rs780583418  | 3.18E-05          | 62.6           |
| 50   | p.Asp167Gly | c.500A>G   | 17688003        | rs745559968  | 3.18E-05          | 30.7           |
| 51   | p.Met64Val  | c.190A>G   | 17690378        | rs771930342  | 3.18E-05          | 45.2           |
| 52   | p.Arg154His | c.461G>A   | 17688042        | rs545602214  | 3.18E-05          | 90.7           |
| 53   | p.Met445Thr | c.1334T>C  | 17662818        | rs776544525  | 3.18E-05          | 27.3           |
| 54   | p.His391Arg | c.1172A>G  | 17663561        | rs749413678  | 3.18E-05          | 84.4           |
| 55   | p.Thr379Ala | c.1135A>G  | 17663598        | rs561591791  | 3.18E-05          | 91.8           |
| 56   | p.Ala357Thr | c.1069G>A  | 17669241        | rs374974565  | 2.83E-05          | 35.5           |
| 57   | p.Lys338Arg | c.1013A>G  | 17669297        | rs573337330  | 2.83E-05          | 85.6           |
| 58   | p.Arg369Gly | c.1105A>G  | 17663628        | rs750824133  | 2.83E-05          | 87.4           |
| 59   | p.Gly326Arg | c.976G>A   | 17669334        | rs770635459  | 2.79E-05          | 0.4            |
| 60   | p.Ala221Thr | c.661G>A   | 17684545        | rs1417290846 | 2.78E-05          | 24.0           |
| 61   | p.Gly358Arg | c.1072G>A  | 17669238        | rs45511697   | 2.48E-05          | 1.7            |
| 62   | p.Arg126Lys | c.377G>A   | 17688126        | rs765071162  | 2.48E-05          | 90.2           |
| 63   | p.Ala69Thr  | c.205G>A   | 17690363        | rs374965869  | 2.47E-05          | 81.9           |
| 64   | p.Met460Ile | c.1380G>C  | 17662772        | rs779529433  | 2.47E-05          | 33.8           |
| 65   | p.Arg9Trp   | c.25C>T    | 17690543        | rs753994372  | 2.42E-05          | 9.5            |
| 66   | p.His293Arg | c.878A>G   | 17672576        | rs767494439  | 2.39E-05          | 61.1           |
| 67   | p.Gly48Val  | c.143G>T   | 17690425        | rs140149634  | 2.39E-05          | 25.7           |
| 68   | p.Gly47Arg  | c.139G>C   | 17690429        | rs202134424  | 2.39E-05          | 7.9            |
| 69   | p.Met121Val | c.361A>G   | 17688142        | rs750075105  | 2.39E-05          | 48.6           |
| 70   | p.Ile93Thr  | c.278T>C   | 17690290        | rs767399919  | 2.39E-05          | 1.0            |
| 71   | p.Tyr236Cys | c.707A>G   | 17684499        | rs145966045  | 2.39E-05          | 18.8           |
| 72   | p.Asp373Val | c.1118A>T  | 17663615        | rs375443506  | 2.39E-05          | 99.6           |
| 73   | p.Met243Ile | c.729G>A   | 17684477        | rs151014930  | 2.12E-05          | 56.7           |
| 74   | p.Thr492Ala | c.1474A>G  | 17662435        | rs780459163  | 2.12E-05          | 93.9           |
| 75   | p.Ala11Val  | c.32C>T    | 17690536        | rs147655483  | 2.01E-05          | 93.1           |
| 76   | p.Pro106Ser | c.316C>T   | 17690252        | rs747107966  | 1.99E-05          | 4.0            |
| 77   | p.Pro193Leu | c.578C>T   | 17684628        | rs199567025  | 1.99E-05          | 17.7           |
| 78   | p.Leu28Pro  | c.83T>C    | 17690485        | rs777404100  | 1.99E-05          | 18.0           |
| 79   | p.Gln97Glu  | c.289C>G   | 17690279        | rs370709874  | 1.99E-05          | 95.7           |
| 80   | p.Ile196Thr | c.587T>C   | 17684619        | rs538708563  | 1.99E-05          | 99.7           |
| 81   | p.Met71Ile  | c.213G>A   | 17690355        | rs770042365  | 1.99E-05          | 0.4            |
| 82   | p.His391Gln | c.1173C>G  | 17663560        | rs780182069  | 1.99E-05          | 97.2           |
| 83   | p.Arg306Gln | c.917G>A   | 17670887        | rs768927379  | 1.77E-05          | 76.4           |
| 84   | p.Arg230Trp | c.688C>T   | 17684518        | rs777662147  | 1.77E-05          | 12.1           |

| Rank | Protein     | Transcript | Chr 22 Position | RefSNP ID    | Allele Frequency <sup>+</sup> | ADA2 activity* |
|------|-------------|------------|-----------------|--------------|-------------------------------|----------------|
| 85   | p.Gly25Cys  | c.73G>T    | 17690495        | rs373732727  | 1.59E-05                      | 64.0           |
| 86   | p.Lys481Asn | c.1443G>T  | 17662466        | rs774795047  | 1.59E-05                      | 51.8           |
| 87   | p.His112Gln | c.336C>G   | 17688167        | rs587777241  | 1.59E-05                      | 1.1            |
| 88   | p.Ile30Thr  | c.89T>C    | 17690479        | rs1350001862 | 1.59E-05                      | 100.6          |
| 89   | p.Thr120Ile | c.359C>T   | 17688144        | rs755786336  | 1.59E-05                      | 12.8           |
| 90   | p.Glu94Asp  | c.282G>C   | 17690286        | rs761776202  | 1.59E-05                      | 85.3           |
| 91   | p.Asp297Tyr | c.889G>T   | 17670915        | rs766661729  | 1.59E-05                      | 23.7           |
| 92   | p.Ala302Thr | c.904G>A   | 17670900        | rs1333898789 | 1.59E-05                      | 70.5           |
| 93   | p.Ser452Cys | c.1355C>G  | 17662797        | rs747458336  | 1.59E-05                      | 10.5           |
| 94   | p.Gly450Ala | c.1349G>C  | 17662803        | rs771622323  | 1.59E-05                      | 49.4           |
| 95   | p.Ala393Thr | c.1177G>A  | 17663556        | rs746332176  | 1.59E-05                      | 94.4           |
| 96   | p.His335Pro | c.1004A>C  | 17669306        | rs2231495    | 1.42E-05                      | 86.4           |
| 97   | p.Phe354Leu | c.1060T>C  | 17669250        | rs373498904  | 1.42E-05                      | 34.1           |
| 98   | p.Arg126Gly | c.376A>G   | 17688127        | rs762848398  | 1.20E-05                      | 9.8            |
| 99   | p.Thr33Ala  | c.97A>G    | 17690471        | rs558427920  | 1.19E-05                      | 91.3           |
| 100  | p.Leu52Val  | c.154C>G   | 17690414        | rs776351526  | 1.19E-05                      | 26.3           |
| 101  | p.Met1?     | c.1A>C     | 17690441        | rs771035807  | 1.19E-05                      | 2.5            |

<sup>+</sup> Data are ranked by allelic frequency in all populations from the Genome Aggregation Database (gnomAD).

\* Enzymatic activity of each variant is expressed as % activity relative to wild-type ADA2.

Red text indicates DADA2-associated variant.

Abbreviations: RefSNP: reference single nucleotide polymorphism ID number

**Table E4.** Analysis of aggregate minor allelic frequency and most common deleterious ADA2 variants at different cut-offs of residual ADA2 activity.

|                      | <u>Cut-off = 10%</u> |           | <u>Cut-off = 25%</u> |           | <u>Cut-off = 35%</u> |       |
|----------------------|----------------------|-----------|----------------------|-----------|----------------------|-------|
| All populations      | 1.637E-03            | R169Q     | 2.122E-03            | R169Q     | 4.618E-03            | M309I |
| African              | 9.158E-04            | R126G     | 1.098E-03            | R126G     | 1.418E-03            | M309I |
| Latino               | 1.483E-03            | R34W      | 2.199E-03            | R34W      | 7.901E-03            | P435A |
| Ashkenazi Jewish     | 9.664E-05            | R49Afs*13 | 9.664E-05            | R49Afs*13 | 5.695E-03            | M309I |
| East Asian           | 3.806E-04            | I93T      | 8.657E-04            | R154C     | 1.326E-03            | M460I |
| Finnish European     | 2.652E-03            | R169Q     | 3.112E-03            | R169Q     | 3.152E-03            | R169Q |
| Non-Finnish European | 1.760E-03            | R169Q     | 2.227E-03            | R169Q     | 4.487E-03            | M309I |
| South Asian          | 1.797E-03            | G47R      | 2.483E-03            | G47R      | 5.684E-03            | M309I |



**Figure E1.**

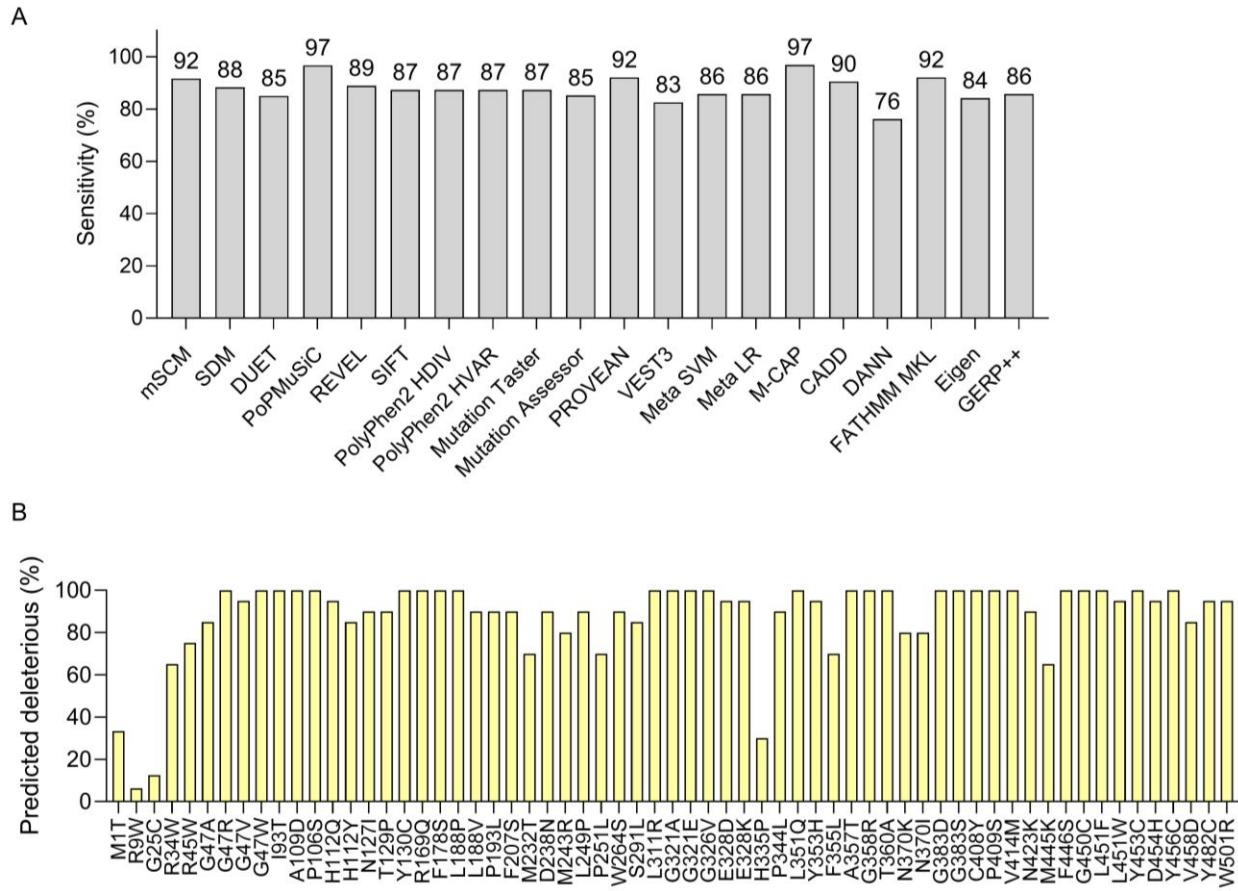

**Figure E1.** Evaluation of missense variants found in DADA2 patients by silico prediction algorithms. A) Sensitivity of various algorithms in predicting the pathogenicity of DADA2-associated variants. B) Proportion of algorithms predicting each variant as deleterious.

**Figure E2.**

A

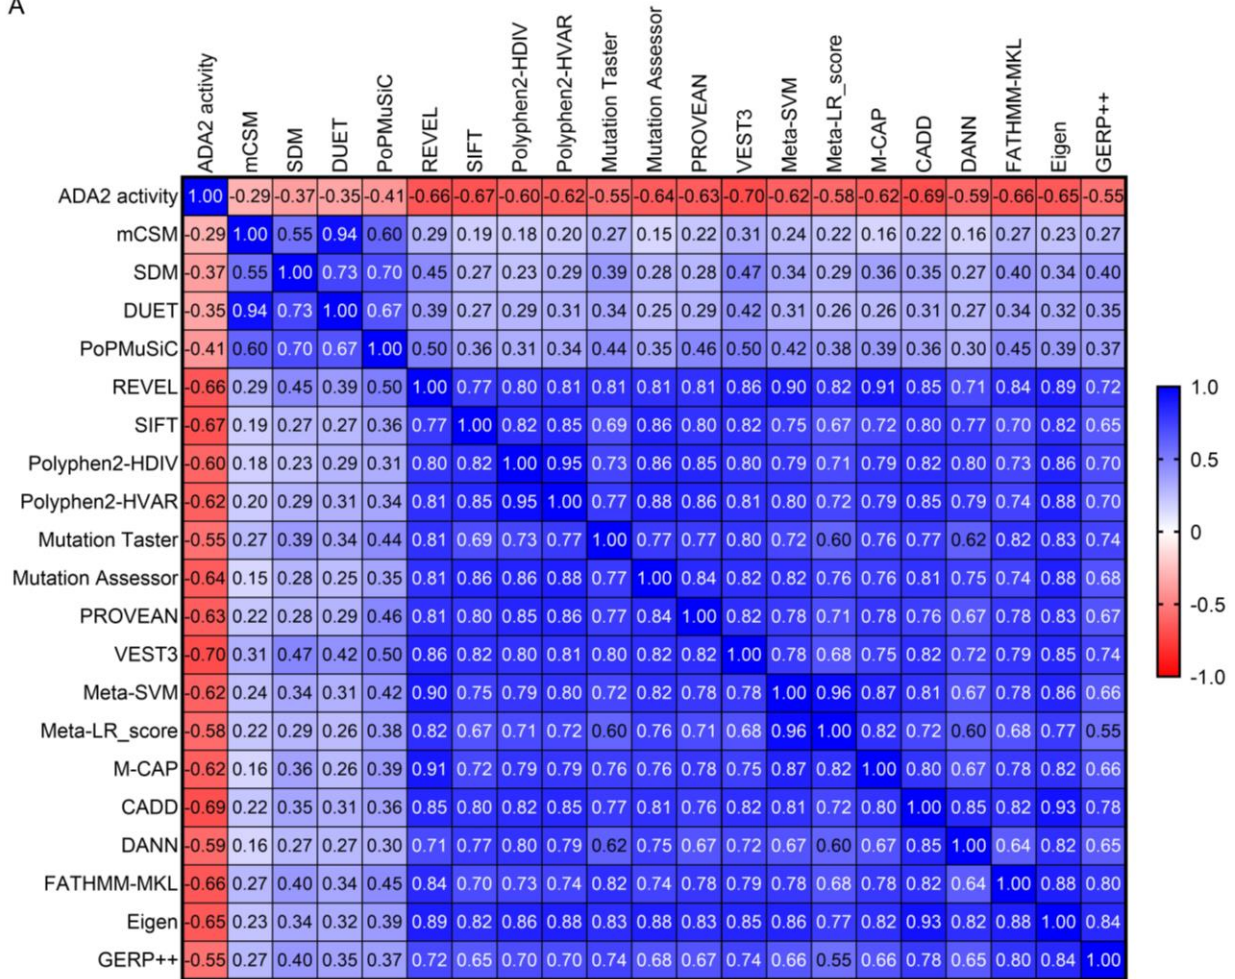

B

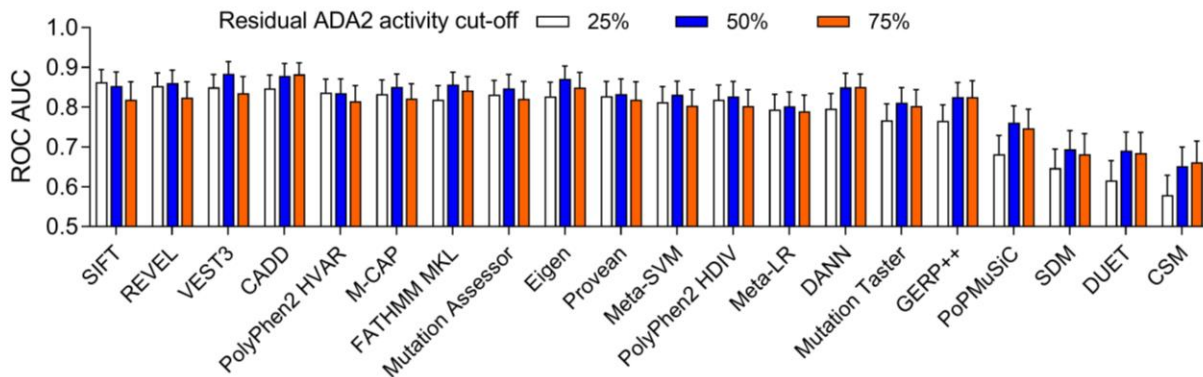

**Figure E2.** Evaluation of 100 ADA2 variants in gnomAD by in silico prediction algorithms. A) Correlation matrix of residual ADA2 activity and raw scores generated from prediction algorithms. B) Performance of prediction algorithms at different cut-offs of residual ADA2 activity used to determine deleterious variants.

## References for Online Repository

1. Alabbas F, Elyamany G, Alsharif O, Hershfield M, Meyts I. Childhood Hodgkin Lymphoma: Think DADA2. *J Clin Immunol* 2019; 39:26-9.
2. Barzaghi F, Minniti F, Mauro M, Bortoli M, Balter R, Bonetti E, et al. ALPS-Like Phenotype Caused by ADA2 Deficiency Rescued by Allogeneic Hematopoietic Stem Cell Transplantation. *Front Immunol* 2018; 9:2767.
3. Belot A, Wassmer E, Twilt M, Lega JC, Zeef LA, Oojageer A, et al. Mutations in CECR1 associated with a neutrophil signature in peripheral blood. *Pediatr Rheumatol Online J* 2014; 12:44.
4. Ben-Ami T, Revel-Vilk S, Brooks R, Shaag A, Hershfield MS, Kelly SJ, et al. Extending the Clinical Phenotype of Adenosine Deaminase 2 Deficiency. *J Pediatr* 2016; 177:316-20.
5. Caorsi R, Penco F, Grossi A, Insalaco A, Omenetti A, Alessio M, et al. ADA2 deficiency (DADA2) as an unrecognised cause of early onset polyarteritis nodosa and stroke: a multicentre national study. *Ann Rheum Dis* 2017; 76:1648-56.
6. Cipe FE, Aydogmus C, Serwas NK, Keskindemirci G, Boztug K. Novel Mutation in CECR1 Leads to Deficiency of ADA2 with Associated Neutropenia. *J Clin Immunol* 2018; 38:273-7.
7. Ekinci RMK, Balci S, Bisgin A, Sasmaz I, Leblebisatan G, Incecik F, et al. A homozygote novel L451W mutation in CECR1 gene causes deficiency of adenosine deaminase 2 in a pediatric patient representing with chronic lymphoproliferation and cytopenia. *Pediatr Hematol Oncol* 2019; 36:376-81.
8. Garg N, Kasapcopur O, Foster J, 2nd, Barut K, Tekin A, Kizilkilic O, et al. Novel adenosine deaminase 2 mutations in a child with a fatal vasculopathy. *Eur J Pediatr* 2014; 173:827-30.
9. Ghurye RR, Sundaram K, Smith F, Clark B, Simpson MA, Fairbanks L, et al. Novel ADA2 mutation presenting with neutropenia, lymphopenia and bone marrow failure in patients with deficiency in adenosine deaminase 2 (DADA2). *Br J Haematol* 2019; 186:e60-e4.
10. Gibson KM, Morishita KA, Dancey P, Moorehead P, Drogemoller B, Han X, et al. Identification of Novel Adenosine Deaminase 2 Gene Variants and Varied Clinical Phenotype in Pediatric Vasculitis. *Arthritis Rheumatol* 2019; 71:1747-55.
11. Gonzalez Santiago TM, Zavialov A, Saarela J, Seppanen M, Reed AM, Abraham RS, et al. Dermatologic Features of ADA2 Deficiency in Cutaneous Polyarteritis Nodosa. *JAMA Dermatol* 2015; 151:1230-4.
12. Hashem H, Kumar AR, Muller I, Babor F, Bredius R, Dalal J, et al. Hematopoietic stem cell transplantation rescues the hematological, immunological, and vascular phenotype in DADA2. *Blood* 2017; 130:2682-8.
13. Insalaco A, Moneta GM, Pardeo M, Caiello I, Messia V, Bracaglia C, et al. Variable Clinical Phenotypes and Relation of Interferon Signature with Disease Activity in ADA2 Deficiency. *J Rheumatol* 2019; 46:523-6.
14. Kaljas Y, Liu C, Skaldin M, Wu C, Zhou Q, Lu Y, et al. Human adenosine deaminases ADA1 and ADA2 bind to different subsets of immune cells. *Cell Mol Life Sci* 2017; 74:555-70.
15. Keer N, Hershfield M, Caskey T, Unizony S. Novel compound heterozygous variants in CECR1 gene associated with childhood onset polyarteritis nodosa and deficiency of ADA2. *Rheumatology (Oxford)* 2016; 55:1145-7.
16. Kisla Ekinci RM, Balci S, Hershfield M, Bisgin A, Dogruel D, Altintas DU, et al. Deficiency of adenosine deaminase 2: a case series revealing clinical manifestations, genotypes and treatment outcomes from Turkey. *Rheumatology (Oxford)* 2020; 59:254-6.
17. Lamprecht P, Humrich JY, Diebold I, Riemekasten G. Diagnosis of deficiency of adenosine deaminase 2 with early onset polyarteritis nodosa in an adult patient with a novel compound heterozygous CECR1 mutation. *Clin Exp Rheumatol* 2018; 36 Suppl 111:177.

18. Lee PY, Huang Y, Zhou Q, Schnappauf O, Hershfield MS, Li Y, et al. Disrupted N-linked glycosylation as a disease mechanism in deficiency of ADA2. *J Allergy Clin Immunol* 2018; 142:1363-5 e8.
19. Lee PY, Kellner ES, Huang Y, Furutani E, Huang Z, Bainter W, et al. Genotype and functional correlates of disease phenotype in deficiency of adenosine deaminase 2 (DADA2). *J Allergy Clin Immunol* 2020; 145:1664-72 e10.
20. Liu L, Wang W, Wang Y, Hou J, Ying W, Hui X, et al. A Chinese DADA2 patient: report of two novel mutations and successful HSCT. *Immunogenetics* 2019; 71:299-305.
21. Michniacki TF, Hannibal M, Ross CW, Frame DG, DuVall AS, Khoriaty R, et al. Hematologic Manifestations of Deficiency of Adenosine Deaminase 2 (DADA2) and Response to Tumor Necrosis Factor Inhibition in DADA2-Associated Bone Marrow Failure. *J Clin Immunol* 2018; 38:166-73.
22. Navon Elkan P, Pierce SB, Segel R, Walsh T, Barash J, Padeh S, et al. Mutant adenosine deaminase 2 in a polyarteritis nodosa vasculopathy. *N Engl J Med* 2014; 370:921-31.
23. Nihira H, Nakagawa K, Izawa K, Kawai T, Yasumi T, Nishikomori R, et al. Fever of unknown origin with rashes in early infancy is indicative of adenosine deaminase type 2 deficiency. *Scand J Rheumatol* 2018; 47:170-2.
24. Ozen S, Batu ED, Taskiran EZ, Ozkara HA, Unal S, Guleray N, et al. A Monogenic Disease with a Variety of Phenotypes: Deficiency of Adenosine Deaminase 2. *J Rheumatol* 2020; 47:117-25.
25. Rama M, Duflos C, Melki I, Bessis D, Bonhomme A, Martin H, et al. A decision tree for the genetic diagnosis of deficiency of adenosine deaminase 2 (DADA2): a French reference centres experience. *Eur J Hum Genet* 2018; 26:960-71.
26. Saettini F, Fazio G, Corti P, Quadri M, Bugarin C, Gaipa G, et al. Two siblings presenting with novel ADA2 variants, lymphoproliferation, persistence of large granular lymphocytes, and T-cell perturbations. *Clin Immunol* 2020; 218:108525.
27. Schepp J, Bulashevskaya A, Mannhardt-Laakmann W, Cao H, Yang F, Seidl M, et al. Deficiency of Adenosine Deaminase 2 Causes Antibody Deficiency. *J Clin Immunol* 2016; 36:179-86.
28. Schnappauf O, Sampaio Moura N, Aksentijevich I, Stoffels M, Ombrello AK, Hoffmann P, et al. Sequence-Based Screening of Patients With Idiopathic Polyarteritis Nodosa, Granulomatosis With Polyangiitis, and Microscopic Polyangiitis for Deleterious Genetic Variants in ADA2. *Arthritis Rheumatol* 2021; 73:512-9.
29. Sharma A, Naidu G, Sharma V, Jha S, Dhooria A, Dhir V, et al. Deficiency of Adenosine Deaminase 2 in Adults and Children: Experience From India. *Arthritis Rheumatol* 2021; 73:276-85.
30. Skrabl-Baumgartner A, Plecko B, Schmidt WM, Konig N, Hershfield M, Gruber-Sedlmayr U, et al. Autoimmune phenotype with type I interferon signature in two brothers with ADA2 deficiency carrying a novel CECR1 mutation. *Pediatr Rheumatol Online J* 2017; 15:67.
31. Springer JM, Gierer SA, Jiang H, Kleiner D, Deutch N, Ombrello AK, et al. Deficiency of Adenosine Deaminase 2 in Adult Siblings: Many Years of a Misdiagnosed Disease With Severe Consequences. *Front Immunol* 2018; 9:1361.
32. Trotta L, Martelius T, Siitonen T, Hautala T, Hamalainen S, Juntti H, et al. ADA2 deficiency: Clonal lymphoproliferation in a subset of patients. *J Allergy Clin Immunol* 2018; 141:1534-7 e8.
33. Tull TJ, Martin B, Spencer J, Sangle S, Chua S, McGrath JA, et al. Sneddon syndrome associated with two novel ADA2 gene mutations. *Rheumatology (Oxford)* 2020; 59:1448-50.
34. Ulirsch JC, Verboon JM, Kazerounian S, Guo MH, Yuan D, Ludwig LS, et al. The Genetic Landscape of Diamond-Blackfan Anemia. *Am J Hum Genet* 2018; 103:930-47.
35. Wang W, Yu Z, Gou L, Zhong L, Li J, Ma M, et al. Single-Center Overview of Pediatric Monogenic Autoinflammatory Diseases in the Past Decade: A Summary and Beyond. *Front Immunol* 2020; 11:565099.

36. Zhou Q, Yang D, Ombrello AK, Zavialov AV, Toro C, Zavialov AV, et al. Early-onset stroke and vasculopathy associated with mutations in ADA2. *N Engl J Med* 2014; 370:911-20.
37. Sundin M, Marits P, Nierkens S, Kolios AGA, Nilsson J. "Immune" Thrombocytopenia as Key Feature of a Novel ADA2 Deficiency Variant: Implication on Differential Diagnostics of ITP in Children. *J Pediatr Hematol Oncol* 2018.
38. Pires DE, Ascher DB, Blundell TL. mCSM: predicting the effects of mutations in proteins using graph-based signatures. *Bioinformatics* 2014; 30:335-42.
39. Worth CL, Preissner R, Blundell TL. SDM--a server for predicting effects of mutations on protein stability and malfunction. *Nucleic Acids Res* 2011; 39:W215-22.
40. Pires DE, Ascher DB, Blundell TL. DUET: a server for predicting effects of mutations on protein stability using an integrated computational approach. *Nucleic Acids Res* 2014; 42:W314-9.
41. Dehouck Y, Kwasigroch JM, Gilis D, Rooman M. PoPMuSiC 2.1: a web server for the estimation of protein stability changes upon mutation and sequence optimality. *BMC Bioinformatics* 2011; 12:151.
42. Sim NL, Kumar P, Hu J, Henikoff S, Schneider G, Ng PC. SIFT web server: predicting effects of amino acid substitutions on proteins. *Nucleic Acids Res* 2012; 40:W452-7.
43. Adzhubei IA, Schmidt S, Peshkin L, Ramensky VE, Gerasimova A, Bork P, et al. A method and server for predicting damaging missense mutations. *Nat Methods* 2010; 7:248-9.
44. Ioannidis NM, Rothstein JH, Pejaver V, Middha S, McDonnell SK, Baheti S, et al. REVEL: An Ensemble Method for Predicting the Pathogenicity of Rare Missense Variants. *Am J Hum Genet* 2016; 99:877-85.
45. Schwarz JM, Rodelsperger C, Schuelke M, Seelow D. MutationTaster evaluates disease-causing potential of sequence alterations. *Nat Methods* 2010; 7:575-6.
46. Reva B, Antipin Y, Sander C. Predicting the functional impact of protein mutations: application to cancer genomics. *Nucleic Acids Res* 2011; 39:e118.
47. Choi Y, Sims GE, Murphy S, Miller JR, Chan AP. Predicting the functional effect of amino acid substitutions and indels. *PLoS One* 2012; 7:e46688.
48. Carter H, Douville C, Stenson PD, Cooper DN, Karchin R. Identifying Mendelian disease genes with the variant effect scoring tool. *BMC Genomics* 2013; 14 Suppl 3:S3.
49. Dong C, Wei P, Jian X, Gibbs R, Boerwinkle E, Wang K, et al. Comparison and integration of deleteriousness prediction methods for nonsynonymous SNVs in whole exome sequencing studies. *Hum Mol Genet* 2015; 24:2125-37.
50. Jagadeesh KA, Wenger AM, Berger MJ, Guturu H, Stenson PD, Cooper DN, et al. M-CAP eliminates a majority of variants of uncertain significance in clinical exomes at high sensitivity. *Nat Genet* 2016; 48:1581-6.
51. Kircher M, Witten DM, Jain P, O'Roak BJ, Cooper GM, Shendure J. A general framework for estimating the relative pathogenicity of human genetic variants. *Nat Genet* 2014; 46:310-5.
52. Quang D, Chen Y, Xie X. DANN: a deep learning approach for annotating the pathogenicity of genetic variants. *Bioinformatics* 2015; 31:761-3.
53. Shihab HA, Rogers MF, Gough J, Mort M, Cooper DN, Day IN, et al. An integrative approach to predicting the functional effects of non-coding and coding sequence variation. *Bioinformatics* 2015; 31:1536-43.
54. Ionita-Laza I, McCallum K, Xu B, Buxbaum JD. A spectral approach integrating functional genomic annotations for coding and noncoding variants. *Nat Genet* 2016; 48:214-20.
55. Davydov EV, Goode DL, Sirota M, Cooper GM, Sidow A, Batzoglou S. Identifying a high fraction of the human genome to be under selective constraint using GERP++. *PLoS Comput Biol* 2010; 6:e1001025.
